1 **Bridging the gap from knowledge to action: Implementation**  
2 **of the data to policy (D2P) training program at sub-national**  
3 **levels in Zambia**

4 **Authors:** Kutha Banda<sup>1\*</sup>, Rabson Zimba<sup>1</sup>, Sandra Chilengi-Sakala<sup>2</sup>, Hilda Shakwelele<sup>1</sup>,  
5 Olatubosun Akinola Akinola<sup>1</sup>

6 <sup>1</sup>Clinton Health Access Initiative, Zambia Country Office

7 <sup>2</sup> Zambia National Health Research Authority

8

9 \*Corresponding author

10 E-mail: [kuthabands@gmail.com](mailto:kuthabands@gmail.com)

11

12

13

14

15

16

17

18

19

20

21

22

23

## 24 **Abstract:**

25 Knowledge translation is the synthesis, exchange, and application of knowledge by relevant  
26 stakeholders to accelerate the benefits of global and local innovation in strengthening health  
27 systems. In Zambia, research evidence is recognized as a critical element for the development of  
28 sound policies. This requires deliberate efforts towards generating, harvesting, and utilizing  
29 evidence from research and program data to inform decision-making. In response, the National  
30 Health Research Authority with support from the Clinton Health Access Initiative adapted a data  
31 to policy curriculum for use at sub-national levels and conducted training for 17 healthcare  
32 workers. The objectives of the training were to build the capacity of healthcare workers in  
33 analyzing research and other data to inform policy and programming as well as to develop six  
34 policy briefs for presentation to policymakers.

35 The curriculum combines epidemiology with economic analysis and modeling to develop  
36 informative policy briefs. Sixteen modules were covered and delivered during periodic interactive  
37 workshops led by facilitators and mentorship was done in-between sessions. This was done within  
38 6 months from February to August 2022. To assess the participants understanding, Kirkpatrick  
39 learning evaluation model was adapted upto level 3; we utilized a pre and posttest method of  
40 assessment.

41 At pre-test, about 71% of the participants scored below 50 percent, while at posttest, all the  
42 participants scored above 50%. Six policy briefs were successfully developed covering Sexual  
43 Reproductive Maternal Newborn Child Adolescent Health and Nutrition topics. Implementation  
44 of this program provided a lot of learnings for programs aimed at improving uptake of evidence  
45 into action. One of the key learnings was that conducting economic evaluations and mathematical  
46 modelling of proposed policy interventions was critical in informing the decision-makers of the  
47 cost and benefits of the interventions. Policy options proposed in the policy brief were largely  
48 accepted by key stakeholders and proposed for piloting.

49

## 50 **Introduction**

51 Knowledge Translation (KT) is “the synthesis, exchange, and application of knowledge by  
52 relevant stakeholders to accelerate the benefits of global and local innovation in strengthening  
53 health systems and improving people’s health.” This entails the scientific process of promoting the  
54 uptake of knowledge into practice or strategies used to bridge the gap between research and  
55 practice. WHO later defined knowledge translation in public health as “the dynamic interface that  
56 links health information and research with policy and practice in an effort to foster evidence-  
57 informed policy using different tools (1–3).

58 Lack of utilization of research results and available knowledge leads to inefficiency and reduction  
59 in both quantity and quality of life as there is broad evidence linking translation of evidence to  
60 improvement of health care (4). There are many reasons why there is a gap between the production  
61 of knowledge and its utilization; some of these include the lack of understanding of policy needs  
62 by researchers, research papers being complex in nature and difficult for policymakers to  
63 understand and utilize. This, therefore, entails the need for a close relationship among researchers,  
64 policymakers, and practitioners (5). To address this gap, the capacity building of both researchers,  
65 policymakers and practitioners in knowledge translation is key to achieving desired results in  
66 health care (6).

67 In Zambia, the government has made commendable progress towards achieving its mission of  
68 providing quality, cost-effective health services as close to the family as possible by establishing  
69 systems that ensure healthcare delivery is in line with this mission. One notable system is evidence-  
70 based policy formulation. Research evidence is recognized as a critical element necessary for the  
71 development of sound policies, and this is in line with national development strategies. This

72 requires deliberate efforts towards generating, harvesting, and utilizing evidence from research  
73 and program data to inform policy formulation, resource allocation and decision-making. To do  
74 this, capacities for both the generators of evidence and the users must be built.

75 In Zambia, knowledge translation has become a leading approach in reducing the gap between  
76 research and policy. This has been a technique used since the World Ministerial summit held in  
77 Mexico in 2004 (7) which set the goal for knowledge translation as evidence-informed policy and  
78 policy-informed research. Subsequent efforts for the African region for knowledge translation  
79 system strengthening include 2008's Bamako call and the research for health 2016-2025 strategy.  
80 These have been domesticated at country level and reflected in different national documents  
81 including national policies as well as the 8<sup>th</sup> national development plan, national health, and the  
82 national health research strategic plans. This forms a firm ground for knowledge translation and  
83 helps in building trust and dialogue among researchers and policymakers.

84 Identifying the best way to translate research evidence into policy and practice remains an enduring  
85 challenge in many health systems across the globe. In an effort to address this challenge in Zambia,  
86 the NHRA has been conducting a training program under its knowledge translation function called  
87 the Data to Policy (D2P) training with officers in the health sector at the national level. The D2P  
88 program is a capacity-building program meant to equip health professionals with the skills to  
89 develop evidence-based policy briefs to translate knowledge into an easier-to-understand format  
90 for policymakers. The program utilizes evidence from research and existing public health data to  
91 package and formulate policy options for policy recommendation and decision-making. It  
92 combines epidemiology with economic analysis and modeling to develop informatics, policy and  
93 technical briefs.

94 The D2P program has been implemented at the national level over the past five years since 2017;  
95 however, this had not been rolled out to sub-national levels. In order to ensure that this program  
96 meets the needs of decision-makers at the sub-national levels and is implemented taking into  
97 account the systems at those levels, the NHRA with technical support from the Clinton Health  
98 Access Initiative (CHAI) and funding from the Embassy of Sweden in Zambia adapted the national  
99 D2P curriculum to develop a curriculum for sub-national levels in 2022. The curriculum aims to  
100 ensure that healthcare workers have the skills to address the complexity of knowledge utilization  
101 and that knowledge users or policymakers understand the process of integrating research into  
102 policy and practice. The curriculum is targeted at frontline officers implementing  
103 activities/services in provinces. This model acknowledges Michael Lipsky’s concept of street-  
104 level bureaucrats “public service workers who interact directly with citizens in the course of their  
105 jobs, and who have substantial discretion in the execution of their work”(8) as key in developing  
106 policies.

107 The D2P curriculum developed for sub-national levels was piloted in Eastern and Southern  
108 provinces of Zambia from February to August 2022. This is also in line with the WHO Strategic  
109 and Technical Advisory Group of Experts (STAGE) for Maternal, Newborn, Child and Adolescent  
110 Health and Nutrition (MNCAHN) recommendations on how to improve knowledge translation in  
111 MNCAHN (9). The objectives of the training program were (1) build the capacity of healthcare  
112 workers to analyze research and other available data to inform policy and programming of Sexual  
113 Reproductive Maternal Newborn Child Adolescent Health and Nutrition (SRMNCAH&N) (2) to  
114 develop six policy briefs and present the policy briefs to policymakers. This paper highlights  
115 lessons learnt in implementing this program.

## 116 **Materials and Methods**

117 The D2P sub-national training program pilot targeted healthcare workers in Eastern and Southern  
118 provinces riding on the Peace at the Centre (PeaCe) health program implemented by the Ministry  
119 of Health in the provinces alongside CHAI with support from the Embassy of Sweden. This  
120 program covers a total of 16 modules (10) adapted from the national level D2P program. The  
121 modules were delivered during periodic interactive workshops led by trained facilitators.

### 122 **Modules**

123 The curriculum and modules adoption was done in consultation with representation from CHAI,  
124 NHRA, the Zambia National Public Health Institute, the University of Zambia- School of public  
125 health, the Tropical Diseases Research Centre and two officers from the pilot provinces. The  
126 modules in this curriculum include:

- 127 1. Zambia knowledge translation story. This provided an overview of the country's  
128 efforts of strengthening knowledge translation through integrating it in the different  
129 laws, regulations and guidelines developed to this effect.
- 130 2. Introduction to data to policy. Gives an overview of content covered in the program.
- 131 3. Policy and policy briefs. The module gives an introduction to public health policies,  
132 types of policies and how policies are made.
- 133 4. Literature search and data sources. Provides a guide to the different types of data,  
134 where it can be found and how to search for it.

- 135           5. Problem statement and root cause analysis. Provides a guide on how to frame a  
136           problem and root cause analysis using tools such as fishbone diagram in order to arrive  
137           at critical causes.
- 138           6. Epidemiologic measures in policy briefs. This modules covers several measures of  
139           diseases such as population attributable risk, statistical significance and how this data  
140           can be used to tell a story.
- 141           7. Identification of policy options. This module covers policy analysis by assessing  
142           the public health impact, budgetary impact, economic impact and feasibility as well as  
143           assessing the validity of the evidence used.
- 144           8. Stakeholder identification and mapping. The module covers several steps of  
145           stakeholder analysis including stakeholder identification, mapping, interviews and  
146           analysis and provides different tools for this.
- 147           9. Framing an economic evaluation. This covers different economic evaluation  
148           methods for partial and full analysis.
- 149           10. Assessing policy options health impacts. The module covers how to assess the  
150           health impact of the proposed policy interventions by building models. Several tools  
151           can be used, including the decision tree in Microsoft excel, which is free of charge.
- 152           11. Cost analysis. This module focuses on calculating costs and the different types of  
153           costs to account for in the different interventions.

154 12. Economic evaluation; Cost-effectiveness analysis and budget impact analysis. This  
155 module guides on the different types of economic evaluation and different formulas  
156 used for calculating these as well as budget impact analysis.

157 13. Sensitivity analysis. This teaches the participants how to conduct sensitivity  
158 analysis.

159 14. Effective writing. This module guides the participants how to use different skills to  
160 simplify the analysis for effective communication to different audiences.

161 15. Making and writing recommendations. This module gives tip to learners on how to  
162 make actionable recommendations.

163 16. Advocacy strategy and communication. The module provides a guide on what  
164 policy advocacy is and key strategies that can be used.

## 165 **Course format**

166 We delivered the course within 6 months (from February to August 2022) through virtual and in-  
167 person sessions. The project, took in seventeen participants recommended by the Provincial Health  
168 Offices (PHOs) – 8 from Eastern and 9 from Southern province. The participants were put in 6  
169 groups of 2-3 members to work as a team on developing the policy briefs based on an agreed topic  
170 of primary importance in their province. Each team had 2 or 3 mentors assigned to them: 1 or 2  
171 focusing on the public health and epidemiological aspects, and 1 focusing on costing and economic  
172 modelling of recommendations and assumptions of the policy briefs.

173 Three week-long main learning and writing sessions/workshops were held in-person covering 4-5  
174 modules of the curriculum each. A fourth in-person workshop was also held for 5 days to focus on



175 writing the policy briefs and preparation of presentations for the policy forum. These were  
176 interactive in nature to allow diverse thinking on each topic. Two other workshops lasting 5-8 days  
177 (half days) were held virtually for mentors to work with mentees on developing the policy briefs.  
178 Furthermore, weekly check-in sessions usually lasting an hour were held between mentors and  
179 mentees in each group, these sessions were useful for each group to discuss the assigned  
180 deliverables.

181 Additional to the learning and writing sessions, the D2P program employs the integrated  
182 Knowledge Translation (iKT) technique where stakeholders are engaged throughout the policy  
183 briefs writing process. The stakeholders engaged included technical experts and members of  
184 Technical Working Groups (TWGs) on the specific topics from national to sub-national levels.

185 At the beginning of the training, participants were made aware of the course objectives and  
186 deliverables, and to assess their understanding of the key concepts of the course, Kirkpatrick  
187 learning evaluation model (11) was adapted up to level 3. The model has four levels including:

- 188 1. Reaction: This level evaluates how the learners felt, and their personal reactions to the  
189 training or learning experience
- 190 2. Learning: This is the measurement of the increase in knowledge or intellectual capability  
191 from before to after the learning experience
- 192 3. Behavior: This is the extent to which the learners applied the learning and changed their  
193 behavior, and this can be immediately and several months after the training.
- 194 4. Results: This is the effect on the environment resulting from the improved performance of  
195 the learner - it is the acid test

196 The Kirkpatrick model was adapted and used up to level 3 to inform program improvement. Level  
197 1 and 2 of the evaluations were based on the learning environment, these levels focused on the  
198 D2P course delivery, mentorship and understanding of the content. Level 3 of the evaluation

199 focused on the performance of the learners in terms of their ability to analyze, synthesize data and  
200 produce policy briefs. To analyze this data, we utilized a pre and posttest method of assessment  
201 using survey questionnaire Survey CTO. This data was analyzed using STATA software package.

## 202 **Results and Discussion**

203 In this section, we share the social demographic characteristics of the participants and their pre  
204 and post-training scores. We further share lessons learnt in implementing the program and  
205 summarize key outcomes.

206 Table 1 shows that about 41% of the participants were aged between 30 and 49: of these, 65% of  
207 them were male. Fifty nine percent of the participants had master's degrees and 41% were medical  
208 doctors by training. The participants' designations included managers, program officers, planners  
209 and information officers with the majority of them (24%) being District Health Directors (DHDs)

210

211

212

213

214

215

216

217

218

219 Table 1: Social-demographic characteristics of participants

| <b>Demographic characteristics</b>                                   |                         |                |
|----------------------------------------------------------------------|-------------------------|----------------|
| <b>Characteristics</b>                                               | <b>Freq.<br/>(N=17)</b> | <b>Percent</b> |
| <b>Age group</b>                                                     |                         |                |
| 18-29                                                                | 1                       | 6              |
| 30-39                                                                | 7                       | 41             |
| 40-49                                                                | 6                       | 35             |
| 50-59                                                                | 3                       | 18             |
| <b>Sex</b>                                                           |                         |                |
| Female                                                               | 6                       | 35             |
| Male                                                                 | 11                      | 65             |
| <b>Highest education attained</b>                                    |                         |                |
| Diploma                                                              | 1                       | 6              |
| Degree                                                               | 4                       | 24             |
| Masters                                                              | 10                      | 59             |
| PhD                                                                  | 2                       | 12             |
| <b>Training background</b>                                           |                         |                |
| Demography                                                           | 1                       | 6              |
| Environmental Health                                                 | 1                       | 6              |
| Medical Doctor                                                       | 7                       | 41             |
| Monitoring and Evaluation                                            | 1                       | 6              |
| Nursing/Midwifery                                                    | 4                       | 24             |
| Nutritionist                                                         | 2                       | 12             |
| Planner                                                              | 1                       | 6              |
| <b>Designation</b>                                                   |                         |                |
| Clinical care specialist                                             | 1                       | 6              |
| District Health Director                                             | 4                       | 24             |
| Nursing Officer                                                      | 3                       | 18             |
| Nutritionist                                                         | 2                       | 12             |
| Planner                                                              | 1                       | 6              |
| Provincial Quality Assurance and Quality Improvement Program Officer | 1                       | 6              |
| Senior Health Information Officer                                    | 2                       | 12             |
| Senior Health Promotion Officer                                      | 1                       | 6              |
| Senior Medical Superintendent                                        | 2                       | 12             |

221 **Objective 1: To build the capacity of healthcare workers to analyze research and other**  
222 **available data to inform policy and programming of Sexual Reproductive Maternal**  
223 **Newborn Child Adolescent Health and Nutrition (SRMNCAHN)**

224 We administered a pre and post-test to the participants to gauge their knowledge of the different  
225 concepts in the curriculum. This included questions on policy analysis, epidemiology and  
226 economic analysis. We found that at pre-test, about 71% of the participants scored below 50  
227 percent, while at post-test, all the participants scored above 50% (table 2).

228 Table 2: Overall performance of participants

| <b>Knowledge level</b>                     |                     |                |
|--------------------------------------------|---------------------|----------------|
| <b>Characteristics</b>                     | <b>Freq. (N=17)</b> | <b>Percent</b> |
| <b>Aggregate percentage score pre-test</b> |                     |                |
| <50                                        | 12                  | 71             |
| 50+                                        | 5                   | 29             |
| <b>Aggregate score post-test</b>           |                     |                |
| 50+                                        | 17                  | 100            |

229

230 **Objective 2: To develop six policy briefs and present the policy briefs to policy makers**

231 Six policy briefs were developed during the mentorship entitled:

- 232 1. It Isn't Just a Little Rash! Protect a child from measles by improving uptake of the second  
233 measles vaccine dose through mandatory birth registration and vaccination tracking in  
234 Southern province.
- 235 2. How Many Newborn Babies Can We Save By Booking Antenatal Care Early? Introduce  
236 free early community pregnancy detection in Southern province.
- 237 3. Iron for a Strong, Smart and Healthy Child! Reducing the high prevalence of anaemia in  
238 children aged 6-23 months in Southern Province, Zambia.

239 4. Save Adolescent Girls' Lives! Enhanced contraceptive uptake key to reducing maternal  
240 mortality in adolescents.

241 5. Born Alive to Thrive! Ending preventable stillbirths in Eastern Province

242 6. Trauma-Informed Care! A solution to post intimate partner violence depression  
243 management in Eastern Province, Zambia

244 The policy briefs were presented at provincial policy forums with several stakeholders. These were  
245 further used to engage policymakers including 10 parliamentarians at the 10<sup>th</sup> Zambia Health  
246 Research Conference. The policy forum provided an opportunity for discussion of the proposed  
247 interventions as compared to the status quo and the recommendation from this meeting was to  
248 lobby for resources to pilot the recommended policy options in the respective provinces.

#### 249 **Lessons learned**

250 Implementation of this program provided a lot of learnings for programs aimed and improving  
251 uptake of evidence into action. Some of these lessons include:

252 1. The importance of involving the implementers in the process of developing policies cannot  
253 be overemphasized. Having the program implementers with understanding of the practical  
254 challenges they face to be the ones to analyze data and develop policy recommendations  
255 was key to acceptance of results and henceforth implementation.

256 2. Involving Implementers that generate the routine data to develop the policy briefs made  
257 them appreciate their role and importance of generating quality data for it to be informative.

258 3. Developing policies at sub-national levels acknowledging the decision making powers at  
259 those levels is important in contextualizing interventions to those a particular environment

- 260 4. Engagement of stakeholders including community members in the process from problem  
261 identification, identification of policy options and evaluation of the policy options was  
262 critical for buy-in and ownership of results/recommendations
- 263 5. Conducting economic evaluations and mathematical modelling of proposed interventions  
264 was critical in informing the decision-makers of the cost and benefits of the proposed  
265 interventions

## 266 **Challenges**

267 *Time constraint due to competing priorities:* The time commitment of the participants was a  
268 challenge, given that they all run extremely busy offices. The time constraint was mitigated by  
269 setting time expectation from the beginning as the program is highly involving for detailed  
270 literature review and data analysis as well as economic analysis. Further, an orientation of the  
271 program was provided to the supervisors of the officers to get their buy-in and continuous  
272 engagement was done to ensure availability of the participants amidst other competing priorities.

273 *Access to data:* Another challenge encountered was access to some articles which were not open  
274 access particularly those which presented results of effective interventions in similar settings. In  
275 some cases, journal articles which seemed to have data on effective interventions and their cost  
276 was not open access and this inhibited access for the participants. Another challenge noted was the  
277 limited context applicable data on effective interventions.

## 278 **Conclusion**

279 There are several challenges faced in health care. These include challenges in the improvement of  
280 health care systems and reducing the risk of adverse events, failure to optimally use evidence  
281 generated in research greatly contributes to these challenges especially in developing countries

282 like Zambia. Effective translation of research evidence into policy and practice is important for  
283 improving health outcomes and reducing health inequities, and this essentially addresses the  
284 “know-do” gap (12); one of the barriers to the utilization of research results is that researchers  
285 misunderstand the needs of decision-makers and consequently, decision-makers may not use  
286 existing research evidence in their decision-making. The D2P program provided an opportunity  
287 for researchers, practitioners and decision-makers to engage in an effort to close the “know-do”  
288 gap.

289 Furthermore, to steer clear of spending billions annually in public and private sectors of  
290 biomedical, clinical, and health services research, it is important that healthcare professional  
291 training and continuing professional development in KT programs such as D2P is enhanced (13).  
292 This program was largely accepted by key stakeholders including parliamentarians who  
293 recommended having regular dialogues of this nature to achieve the government’s mission of  
294 providing quality, cost-effective health services as close to the family as possible.

295

## 296 **Acknowledgments**

297 We would like to acknowledge the Centre for Disease Control and Prevention Foundation (CDCF)  
298 through the data for health initiative, vital strategies and the Bloomberg data for health initiative  
299 for developing the original D2P curriculum which was adapted for the sub-national curriculum.  
300 We also thank the National Health Research Authority for managing the D2P program. Further  
301 thanks go to the mentors who provided their time to teach and mentors the participants and the  
302 participants from Eastern and Southern province of Zambia for taking this course and engaging  
303 with key stakeholders. Lastly, we would like to thank the Embassy of Sweden in Zambia for  
304 finding the program and making this achievement possible.

## 305 **References**

- 306 1. World Health Organization. Resolution WHA58.34. Ministerial summit on health research.  
307 In: Fifty-eighth World Health Assembly, Geneva, 16–25 May 2005. Geneva [Internet]. 2005.  
308 Available from: [https://apps.who.int/gb/ebwha/pdf\\_files/WHA58-](https://apps.who.int/gb/ebwha/pdf_files/WHA58-REC1/english/A58_2005_REC1-en.pdf)  
309 [REC1/english/A58\\_2005\\_REC1-en.pdf](https://apps.who.int/gb/ebwha/pdf_files/WHA58-REC1/english/A58_2005_REC1-en.pdf)
- 310 2. World Health Organization. Bridging the “Know–Do” gap. Meeting on knowledge translation  
311 in global health, Geneva, 10– 12 October 2005. Geneva [Internet]. 2006. Available from:  
312 [https:// www.measureevaluation.org/resources/training/capacity-building-resources/high-](https://www.measureevaluation.org/resources/training/capacity-building-resources/high-impactresearch-training-curricula/bridging-the-know-do-gap.pdf/view)  
313 [impactresearch-training-curricula/bridging-the-know-do-gap.pdf/view](https://www.measureevaluation.org/resources/training/capacity-building-resources/high-impactresearch-training-curricula/bridging-the-know-do-gap.pdf/view)
- 314 3. WHO Regional Office for Europe. Action plan to strengthen the use of evidence, information  
315 and research for policy-making in the WHO European Region. Copenhagen [Internet]. 2016.  
316 Available from: [https:// www.euro.who.int/en/about-us/governance/regional-committee-for-](https://www.euro.who.int/en/about-us/governance/regional-committee-for-europe/pastsessions/66th-session/documentation/working-documents/eurrc6612-action-plan-to-strengthen-the-use-of-evidence,-information-and-research-for-policy-making-in-the-who-european-region)  
317 [europe/pastsessions/66th-session/documentation/working-documents/eurrc6612-action-plan-](https://www.euro.who.int/en/about-us/governance/regional-committee-for-europe/pastsessions/66th-session/documentation/working-documents/eurrc6612-action-plan-to-strengthen-the-use-of-evidence,-information-and-research-for-policy-making-in-the-who-european-region)  
318 [tostrengthen-the-use-of-evidence,-information-and-research-for-policy-making-in-the-](https://www.euro.who.int/en/about-us/governance/regional-committee-for-europe/pastsessions/66th-session/documentation/working-documents/eurrc6612-action-plan-to-strengthen-the-use-of-evidence,-information-and-research-for-policy-making-in-the-who-european-region)  
319 [whoeuropean-region](https://www.euro.who.int/en/about-us/governance/regional-committee-for-europe/pastsessions/66th-session/documentation/working-documents/eurrc6612-action-plan-to-strengthen-the-use-of-evidence,-information-and-research-for-policy-making-in-the-who-european-region)
- 320 4. Aaserud M, Lewin S, Innvaer S, Paulsen EJ, Dahlgren AT, Trommald M, et al. Translating  
321 research into policy and practice in developing countries: a case study of magnesium sulphate  
322 for pre-eclampsia. *BMC Health Serv Res*. 2005 Dec;5(1):68.
- 323 5. De Cock KM, Fowler MG, Mercier E, de Vincenzi I, Saba J, Hoff E, et al. Prevention of  
324 Mother-to-Child HIV Transmission in Resource-Poor Countries: Translating Research Into  
325 Policy and Practice. *JAMA*. 2000 Mar 1;283(9):1175.
- 326 6. McGlynn EA, Asch SM, Adams J, Keesey J, Hicks J, DeCristofaro A, et al. The Quality of  
327 Health Care Delivered to Adults in the United States. *N Engl J Med*. 2003 Jun  
328 26;348(26):2635–45.
- 329 7. Kasonde JM, Campbell S. Creating a Knowledge Translation Platform: nine lessons from the  
330 Zambia Forum for Health Research. *Health Res Policy Syst*. 2012 Dec;10(1):31.



- 331 8. Lipsky M. Street-level bureaucracy: Dilemmas of the individual in public service. Russell  
332 Sage Foundation; 2010.
- 333 9. STAGE (Strategic Technical Advisory Group of Experts), Duke T, AlBuhairan FS, Agarwal  
334 K, Arora NK, Arulkumaran S, et al. World Health Organization and knowledge translation in  
335 maternal, newborn, child and adolescent health and nutrition. Arch Dis Child. 2022  
336 Jul;107(7):644–9.
- 337 10. National Health Research Authority. DATA TO POLICY PROGRAM SUB-  
338 NATIONAL CURRICULUM FOR HEALTHCARE WORKERS [Internet]. 2022. Available  
339 from: <https://www.nhra.org.zm/d2p-sub-national-curriculum>
- 340 11. Newstrom JW. Evaluating training programs: The four levels, by Donald L. Kirkpatrick.  
341 (1994). San Francisco: Berrett-Koehler. 229 pp., \$32.95 cloth. Hum Resour Dev Q.  
342 1995;6(3):317–20.
- 343 12. Jessani NS, Rohwer A, Schmidt BM, Delobelle P. Integrated knowledge translation to  
344 advance noncommunicable disease policy and practice in South Africa: application of the  
345 Exploration, Preparation, Implementation, and Sustainment (EPIS) framework. Health Res  
346 Policy Syst. 2021 May 17;19(1):82.
- 347 13. Grimshaw JM, Eccles MP, Lavis JN, Hill SJ, Squires JE. Knowledge translation of  
348 research findings. Implement Sci. 2012 Dec;7(1):50.

349

350

351

352
